# Supplementary material for: Rapid separation of bacteria from primary nasal samples using inertial microfluidics
Source: Royal Society of Chemistry journal article supplement (doi:10.1039/d2lc00794k), 2022-12-07
Supplement: d2lc00794k2.pdf [file d2lc00794k2.pdf]

## Supporting Information

### **Rapid Separation of Bacteria from Primary Nasal Samples using inertial microfluidics**

Jesus Shrestha<sup>1, 2#</sup>, Sajad Razavi Bazaz<sup>1#</sup>, Lin Ding<sup>1</sup>, Steven Vasilescu<sup>1</sup>, Sobia Idrees<sup>3</sup>, Bill Söderström<sup>4</sup>, Philip M. Hansbro<sup>3</sup>, Maliheh Ghadiri<sup>1, 2</sup>, Majid Ebrahimi Warkiani<sup>1, 5, 6\*</sup>

<sup>1</sup>School of Biomedical Engineering, University of Technology Sydney, Sydney, New South Wales 2007, Australia

<sup>2</sup>Woolcock Institute of Medical Research, Respiratory Technology Group, University of Sydney, Sydney, New South Wales 2037, Australia

<sup>3</sup>Centre for Inflammation, Centenary Institute & University of Technology Sydney, School of Life Sciences, Faculty of Science, Sydney, New South Wales 2050 & 2007, Australia

<sup>4</sup> Australian Institute for Microbiology and Infection, Faculty of Science, University of Technology Sydney, New South Wales 2007, Australia

<sup>5</sup>Institute for Biomedical Materials and Devices, Faculty of Science, University of Technology Sydney, New South Wales 2007, Australia

<sup>6</sup>Institute of Molecular Medicine, Sechenov First Moscow State University, Moscow 119991, Russia

<sup>#</sup>These authors contributed equally as first author

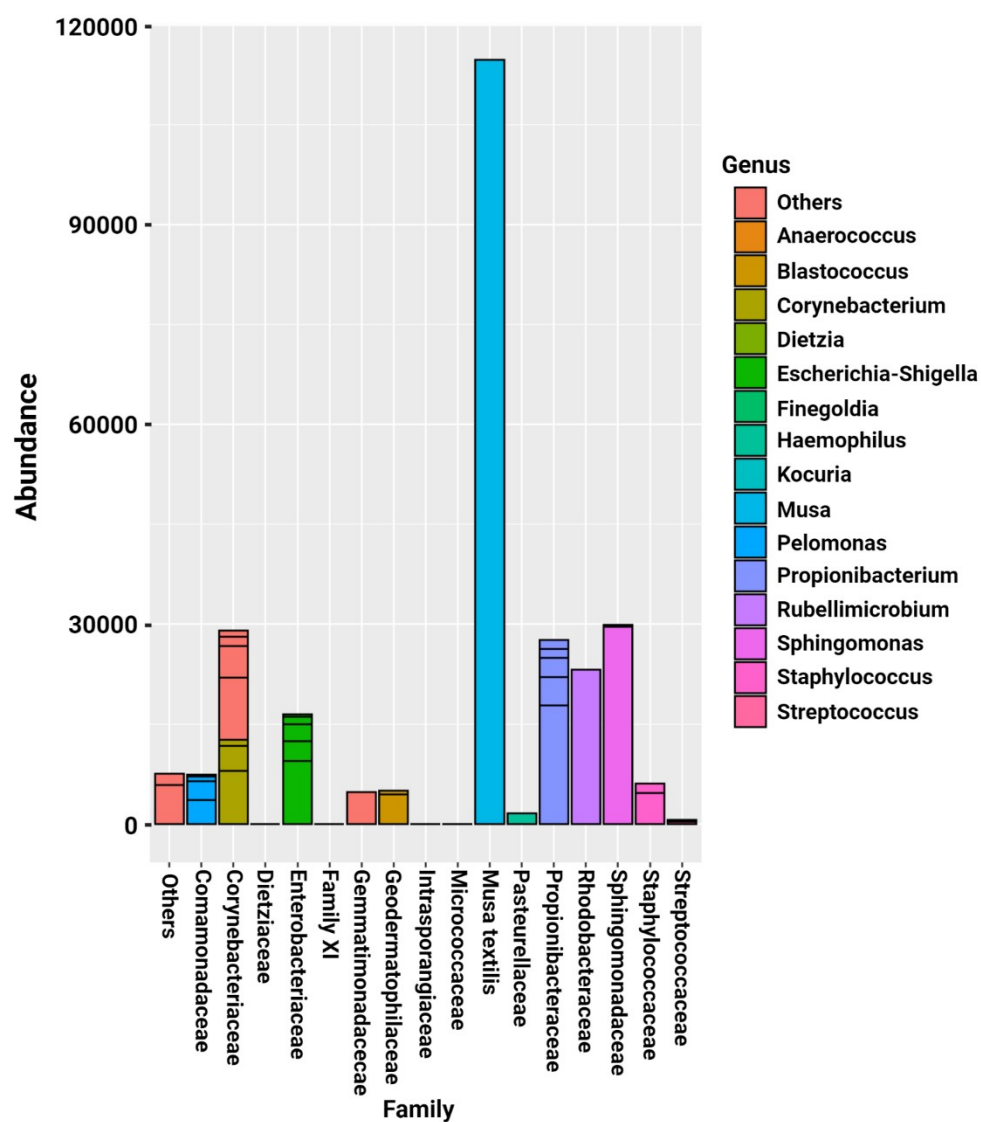

**Fig. S1:** Barplot of top bacterial families and genera identified in samples collected using the microfluidic zig-zag channel.

**Table S1:** Differential abundance of bacteria species in the samples collected using microfluidic zig-zag channels.

|                                                                                                                                              | Base Mean   | log2Fold Change | lfcSE     | Stat       | P Value   | P adjusted |
|----------------------------------------------------------------------------------------------------------------------------------------------|-------------|-----------------|-----------|------------|-----------|------------|
| k_Bacteria; p_Firmicutes; c_Bacilli; o_Bacillales; f_Staphylococcaceae; g_Staphylococcus; s_aureus                                           | 3119.203217 | -30             | 3.454407  | -8.6845587 | 3.80E-18  | 1.33E-16   |
| k_Bacteria; p_Firmicutes; c_Bacilli; o_Bacillales; f_Staphylococcaceae; g_Staphylococcus; s_epidermidis                                      | 872.1555106 | -28.90342201    | 3.4544541 | -8.3670013 | 5.91E-17  | 1.03E-15   |
| k_Bacteria; p_Firmicutes; c_Bacilli; o_Bacillales; f_Staphylococcaceae; g_Staphylococcus; s_capitis-caprae-epidermidis                       | 2132.005435 | -14.82569364    | 3.0884942 | -4.8002983 | 1.58E-06  | 1.39E-05   |
| k_Bacteria; p_Actinobacteria; c_Actinobacteria; o_Corynebacteriales; f_Corynebacteriaceae; g_Corynebacterium; s_accolens-macginleyi          | 2126.178462 | -14.82219769    | 3.07293   | -4.8234739 | 1.41E-06  | 1.39E-05   |
| k_Bacteria; p_Firmicutes; c_Clostridia; o_Clostridiales; f_Family XI; g_Anaerococcus; s_octavius                                             | 466.7432513 | -12.62603181    | 3.4404494 | -3.6698786 | 0.0002427 | 0.00169866 |
| k_Bacteria; p_Actinobacteria; c_Actinobacteria; o_Corynebacteriales; f_Corynebacteriaceae; g_Corynebacterium; s_mucifaciens-ureicelerivorans | 281.9496935 | -11.898965      | 3.4405299 | -3.4584687 | 0.0005433 | 0.00316899 |
| k_Bacteria; p_Firmicutes; c_Bacilli; o_Lactobacillales; f_Streptococcaceae; g_Streptococcus; s_infantis-sanguinis                            | 164.7195316 | -11.12320495    | 3.4406745 | -3.2328559 | 0.0012256 | 0.00546752 |
| k_Bacteria; p_Proteobacteria; c_Alphaproteobacteria; o_Rhizobiales; f_Bradyrhizobiaceae; g_Bradyrhizobium; s_sp43375                         | 162.4852768 | -11.10404423    | 3.4406792 | -3.2272827 | 0.0012497 | 0.00546752 |
| k_Bacteria; p_Actinobacteria; c_Actinobacteria; o_Micrococcales; f_Micrococcaceae; g_Rothia; s_dentocariosa                                  | 146.9777554 | -10.95896401    | 3.4407164 | -3.185082  | 0.0014471 | 0.00562773 |
| k_Bacteria; p_Proteobacteria; c_Alphaproteobacteria; o_Rhodobacterales; f_Rhodobacteraceae; g_Paracoccus-Paracoccus; s_huijuniae-sp44862     | 95.4970958  | -10.33697666    | 3.4409264 | -3.0041261 | 0.0026634 | 0.00932207 |

**Table S2:** Relative abundance of bacterial species in the samples collected using microfluidic zig-zag channels.

|                                                                                                                                                    | Microfluidic Zig-zag |          |          |          |          |
|----------------------------------------------------------------------------------------------------------------------------------------------------|----------------------|----------|----------|----------|----------|
|                                                                                                                                                    | 1                    | 2        | 3        | 4        | 5        |
| k_Bacteria; p_Actinobacteria; c_Actinobacteria; o_Propionibacteriales; f_Propionibacteriaceae; g_Propionibacterium; s_acnes                        | 0.100692             | 0.480077 | 0.368008 | 0.352739 | 0.224201 |
| k_Bacteria; p_Proteobacteria; c_Gammaproteobacteria; o_Pasteurellales; f_Pasteurellaceae; g_Haemophilus; s_parainfluenzae                          | 0                    | 0.183382 | 0        | 0        | 0        |
| k_Bacteria; p_Actinobacteria; c_Actinobacteria; o_Corynebacteriales; f_Corynebacteriaceae; g_Corynebacterium; s_pseudogenitalium-tuberculostrictum | 0.256385             | 0        | 0        | 0.252183 | 0        |
| k_Bacteria; p_Proteobacteria; c_Gammaproteobacteria; o_Enterobacteriales; f_Enterobacteriaceae; g_Escherichia-Shigella; s_coli                     | 0.091615             | 0.335182 | 0.197534 | 0.078063 | 0.19309  |
| k_Bacteria; p_Proteobacteria; c_Betaproteobacteria; o_Burkholderiales; f_Comamonadaceae; g_Pelomonas; s_saccharophila                              | 0.051231             | 0        | 0.074308 | 0.088383 | 0.218545 |
| k_Bacteria; p_Actinobacteria; c_Actinobacteria; o_Corynebacteriales; f_Corynebacteriaceae; g_Corynebacterium; s_accolens                           | 0.031615             | 0.001358 | 0.166231 | 0        | 0        |
| k_Bacteria; p_Actinobacteria; c_Actinobacteria; o_Corynebacteriales; f_Corynebacteriaceae; g_ ; s_sp5276                                           | 0.110846             | 0        | 0.193919 | 0.228632 | 0.364165 |
| k_Bacteria; p_Firmicutes; c_Bacilli; o_Bacillales; f_Staphylococcaceae; g_Staphylococcus; s_caprae-epidermidis                                     | 0.357615             | 0        | 0        | 0        | 0        |

**Supplementary Video 1:** Distribution of epithelial cells and cellular debris present in the human nasopharyngeal swab samples at 150  $\mu\text{l}/\text{min}$  flow rate in the zig-zag channel.
